# Supplementary material
Source: PubMed Central journal article supplement (PMC4085821)
Supplement: Supp_Fig1.pdf [file Supp_Fig1.pdf]

## Supplementary Data

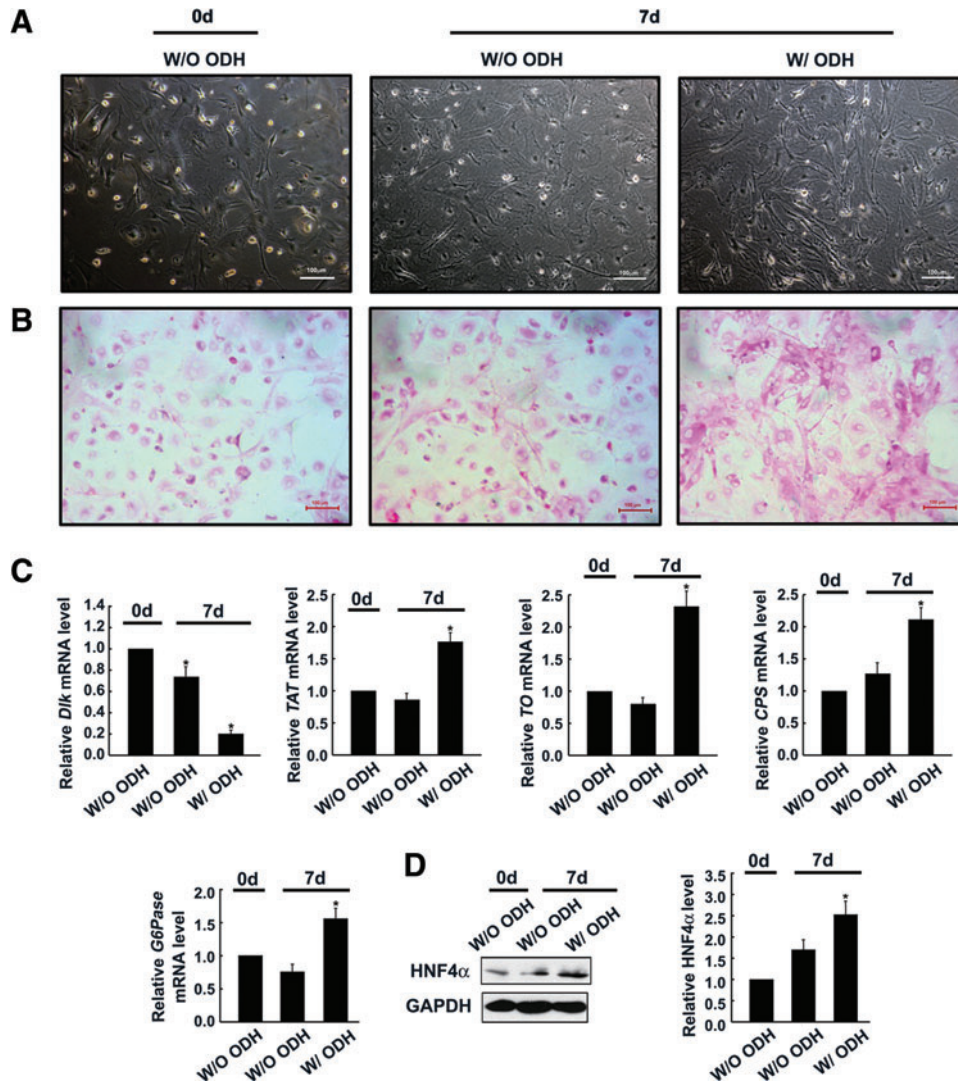

**SUPPLEMENTARY FIG. S1.** The capability of hepatoblasts to develop into mature hepatocytes. **(A)** The morphology under phase-contrast microscopy of the hepatoblasts with or without ODH induction for 7 days is presented. **(B)** Glycogen contents in cultured hepatoblasts. The hepatoblasts were cultured for 7 days in the absence or presence of ODH. Then, the intracellular glycogen accumulation was analyzed by staining the cells with the PAS reagent. Glycogen is shown in *magenta*. Scale bar = 100  $\mu$ m. **(C)** Expression of hepatocyte marker genes in cultures supplemented with ODH. After 7 days of induction, the expression levels of immature hepatocyte markers (*DLK*) and mature hepatocyte markers (*TAT*, *TO*, *CPS*, and *G6Pase*) were evaluated by qRT-PCR. The results are the means  $\pm$  SDs ( $n=5$ ).  $*P < 0.05$  compared with the values at day 0 without ODH. **(D)** Cells were treated with ODH for 7 days. At the end of the incubation, the cells were lysed, and 100  $\mu$ g of protein extract was loaded and separated by SDS/PAGE. Western blotting was performed using antibodies against HNF4 $\alpha$ . The relative densities of the HNF4 $\alpha$  bands were normalized to GAPDH. The values are expressed as the means  $\pm$  SDs of four independent experiments.
