# Supplementary material
Source: PubMed Central journal article supplement (PMC4085821)
Supplement: Supp_Table1.pdf [file Supp_Table1.pdf]

SUPPLEMENTARY TABLE S1. THE SEQUENCES  
OF *ALR* siRNAs AND SCRAMBLED siRNAs

---

*ALR* siRNAs

|            |                     |
|------------|---------------------|
| Sequence 1 | GCUCCGAGAUGAUGGACGA |
| Sequence 2 | ACAAUGAAGUGAACCGCAA |
| Sequence 3 | GGAGUGUGCUGAAGACCUA |
| Sequence 4 | GAAGCGGGACACCAAGUUU |

Scrambled siRNAs

|            |                     |
|------------|---------------------|
| Sequence 1 | AUGAACGUGAAUUGCUCAA |
| Sequence 2 | UAAGGCUAUGAAGAGAUAC |
| Sequence 3 | AUGUAUUGGCCUGUAUUAG |
| Sequence 4 | UAGCGACUAAACACAUCAA |

---
